# Supplementary material
Source: MDPI journal article supplement (https://www.mdpi.com/2227-9709/9/4/84)
Supplement: s1 [file s1]

## **Supplementary**

### **File S1: Interview**

#### **Introduction**

##### *General questions*

- Tell me, how did the idea of creating educational videos come out?
- How has the concept of the videos evolved until now?
- How many people are involved?
- Do you have a multimedia design team?
- Do you have a team or an educational expert?

#### **Content questions**

##### *General characteristics of the videos.*

- How would you define the distinctive element of your content?
- What elements do you think make an educational video successful?

##### *Creation process*

- What is the process to create a video?
- Do you consider a different process according with the theme/season?
- How do you define or decide they way to present the content in a video?
- Do you have any important rule or considerations for the edition process?

##### *Elements and learning principles for the videos*

- What technical, aesthetic, or expressive aspects (images, animations, texts) do you consider when developing videos?
- Do you prefer any didactic technique or pedagogical theory to make the videos?
- Do you have any theorist's influence or any philosophical consideration about knowledge or learning while making videos?
- Do you think is important to formalize or be awareness about theoretical elements in the videos?
- What didactic aspects (motivation, organization, content about audience) do you consider in the production?
- Do you use any kind of learning style to make your videos?
- What resources do you regularly use in a video and why (whiteboard, drawings, etc.)?
- Do you make any distinction when you use some resources depending on the type of the video or the topic?
- What elements are mandatory in your videos?

##### *Audience considerations*

- What element is the most important to you when delivering a video to your audience?
- What considerations do you consider regarding your audience when making a video?



- What type of comments have you received that have helped you change your strategy, content, or topics?

### Close

- Do you feel part of the movement or culture of Edutubers?
- What is your vision for this movement?

**Table S1: Observation guide**

|                                  |                                                    |  |
|----------------------------------|----------------------------------------------------|--|
| General information of the video | ID VIDEO                                           |  |
|                                  | Number of Views                                    |  |
|                                  | Nombre de video                                    |  |
|                                  | Link                                               |  |
|                                  | Edutuber                                           |  |
|                                  | Classification                                     |  |
|                                  | Comments of the analysis                           |  |
|                                  | Audience                                           |  |
| Characteristic<br>s of the video | Interactive                                        |  |
|                                  | Collaborative                                      |  |
|                                  | Consider socio-cultural processes                  |  |
|                                  | Consider prior knowledge                           |  |
|                                  | Interpreting information for meaning construction  |  |
|                                  | Learning through one's own experience (dissonance) |  |
|                                  | Consider information sources                       |  |
|                                  | Include technology                                 |  |
|                                  | Accurate and current knowledge                     |  |
|                                  | Consider the changeable reality                    |  |
|                                  | Concrete experience                                |  |
|                                  | Abstract conceptualization                         |  |
|                                  | Active experiences                                 |  |
|                                  | Reflective                                         |  |
|                                  | Community of practice                              |  |
|                                  | Belonging (consider social structure)              |  |
|                                  | Active participation in collaborative learning     |  |
|                                  | Knowledge as utility                               |  |
|                                  | Reflection                                         |  |
|                                  | Evaluation of information                          |  |
|                                  | Use of mental representations                      |  |
|                                  | Problem solving                                    |  |



|  |                                                                          |  |
|--|--------------------------------------------------------------------------|--|
|  | Creation of a culture product                                            |  |
|  | Logical and hierarchical structure                                       |  |
|  | Representations                                                          |  |
|  | Associations                                                             |  |
|  | Fragmentation                                                            |  |
|  | Preference of words and images                                           |  |
|  | Preference of pictures and narration than text                           |  |
|  | Preference of words and pictures integrated                              |  |
|  | Same information in different format                                     |  |
|  | Avoid irrelevant resources                                               |  |
|  | Use of animation when representing Dynamic phenomena or user interaction |  |
|  | Adequate aids (heading, indexes, graphics, icons)                        |  |
|  | Avoid blocks of information                                              |  |
|  | Colloquial language                                                      |  |
|  | Problems with free solution                                              |  |
|  | Examples of solved problems                                              |  |
|  | Complete problems                                                        |  |
|  | Images + text + explanation                                              |  |
|  | Replace written for spoken explication                                   |  |
|  | Avoid less effective source of information                               |  |
|  | Increase help for novices and reduce help for advanced students          |  |
|  | Scaffolding fading                                                       |  |
|  | Avoid transit information                                                |  |
|  | Mentally review what has been learned.                                   |  |
|  | Fragment information                                                     |  |
|  | Collective working memory for complex content                            |  |
|  | Memorization of concepts                                                 |  |
|  | Expects behavioral change                                                |  |
|  | Active modeling                                                          |  |
|  | Emotion facilitates behaviors                                            |  |
|  | Direct reinforcement                                                     |  |
|  | Vicarious reinforcement                                                  |  |
|  | Self-reinforcement                                                       |  |
|  | Consider a positive/negative behavioral reinforcer                       |  |
|  | Attempts to develop new behaviors                                        |  |
|  |                                                                          |  |
